# Supplementary material for: Theoretical study on the mechanism of water oxidation catalyzed by a mononuclear copper complex: important roles of a redox non-innocent ligand and HPO42−anion
Source: Royal Society of Chemistry journal article supplement (doi:10.1039/d3ra00648d), 2023-01-01
Supplement: d3ra00648d1.pdf [file d3ra00648d1.pdf]

## Supplementary Information

For

### **Theoretical Study on the Mechanism of Water Oxidation Catalyzed by a Mononuclear Copper Complex: Important Roles of Redox Non-Innocent Ligand and the $\text{HPO}_4^{2-}$ Anion**

Ying-Ying Li <sup>a\*</sup>, Xiao-Yan Wang<sup>a</sup>, Hui-Ji, Li<sup>a</sup>, Jia-Yi, Chen<sup>b</sup>, Yao-Hua Kou<sup>a</sup>, Xiao  
Li<sup>a</sup>, Ya-Ping Wang<sup>a</sup>

<sup>a</sup>School of Chemistry and Chemical Engineering, Zhengzhou Normal University,  
Zhengzhou 450044, China.

<sup>b</sup>Key Laboratory of Material Chemistry for Energy Conversion and Storage, Ministry  
of Education, Hubei Key Laboratory of Bioinorganic Chemistry and Materia Medica,  
Hubei Key Laboratory of Materials Chemistry and Service Failure, School of  
Chemistry and Chemical Engineering, Huazhong University of Science and  
Technology, Wuhan 430074, P. R. China.

\*Corresponding author: [liyinying@zznu.edu.cn](mailto:liyinying@zznu.edu.cn)

## Contents

|                                                                                                   |   |
|---------------------------------------------------------------------------------------------------|---|
| S1. Optimized structure of $3_{\text{pt}}$ , $4_{\text{pt}}$ and TS' .....                        | 3 |
| S2. Optimized structure of $\text{TS0}_{\text{Doublet}}$ and $\text{Int0}_{\text{Doublet}}$ ..... | 4 |
| S3. Gibbs free energy diagrams for water oxidation at B3LYP*-D3, PBE0-D3, and M06-D3 levels.....  | 5 |
| S4. Coordinates for all structures. ....                                                          | 8 |

## S1. Optimized structure of 3<sub>pt</sub>, 4<sub>pt</sub> and TS'

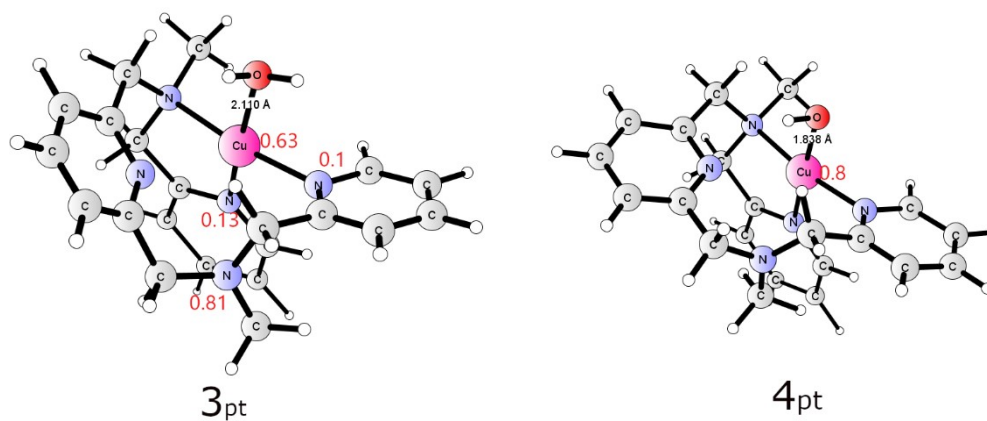

Figure S1. Optimized structure of 3<sub>pt</sub> (Triplet), 4<sub>pt</sub> (Doublet) and TS' (Doublet). Selected distances are shown in Angstrom in black. Spin densities on selected atoms are presented in red.

## S2. Optimized structure of TS0Doublet and Int0Doublet

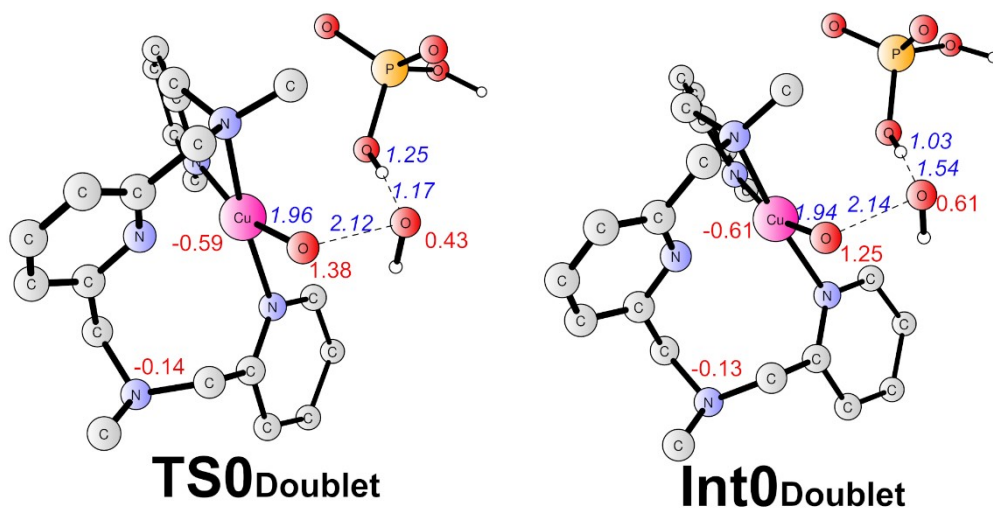

Figure S2. Optimized structure of TS0<sub>Doublet</sub> and Int0<sub>Doublet</sub>. Selected distances are shown in Angstrom in black. Spin densities on selected atoms are presented in red.

**S3. Gibbs free energy diagrams for water oxidation at B3LYP\*-D3, PBE0-D3, and M06-D3 levels.**

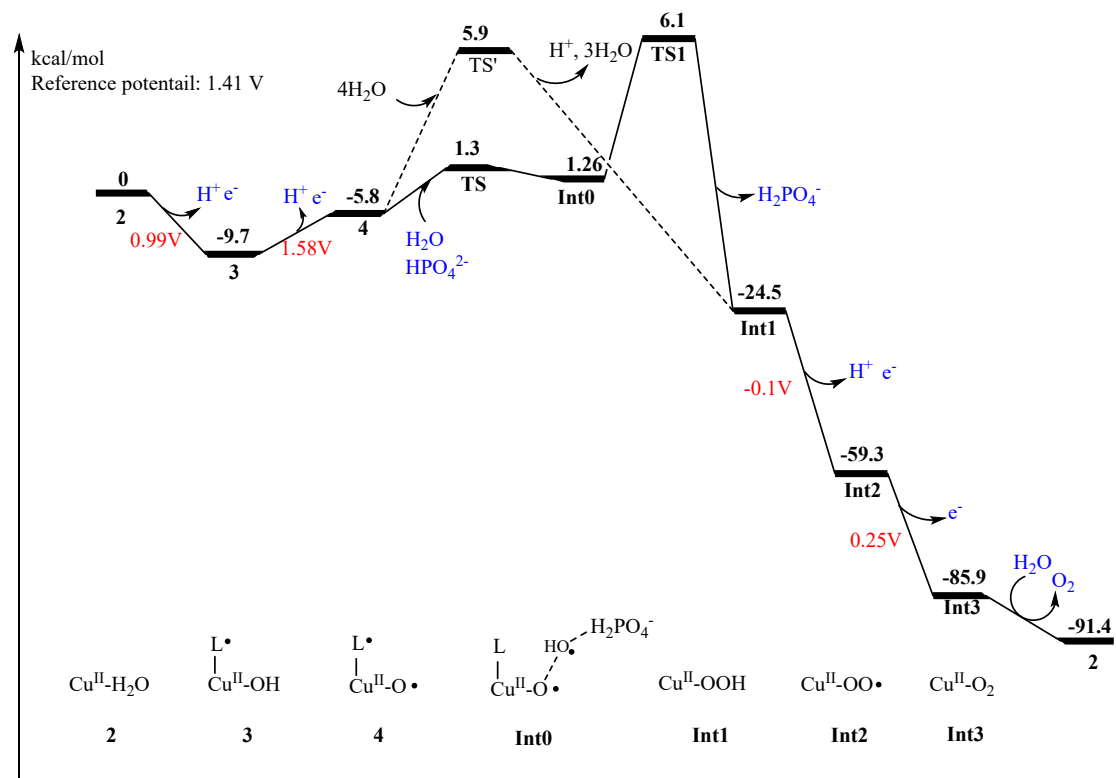

Figure S3. Energy diagram for water oxidation with B3LYP-15%-D3.

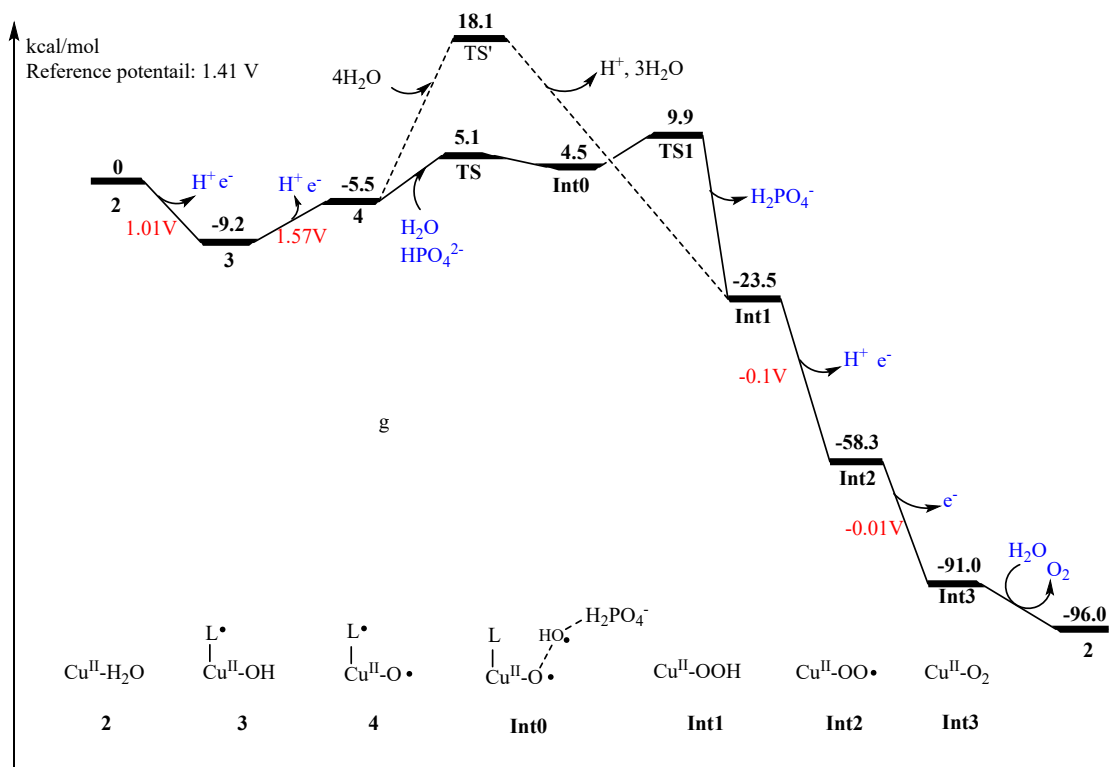

Figure S4. Energy diagram for water oxidation with PBE0-D3.

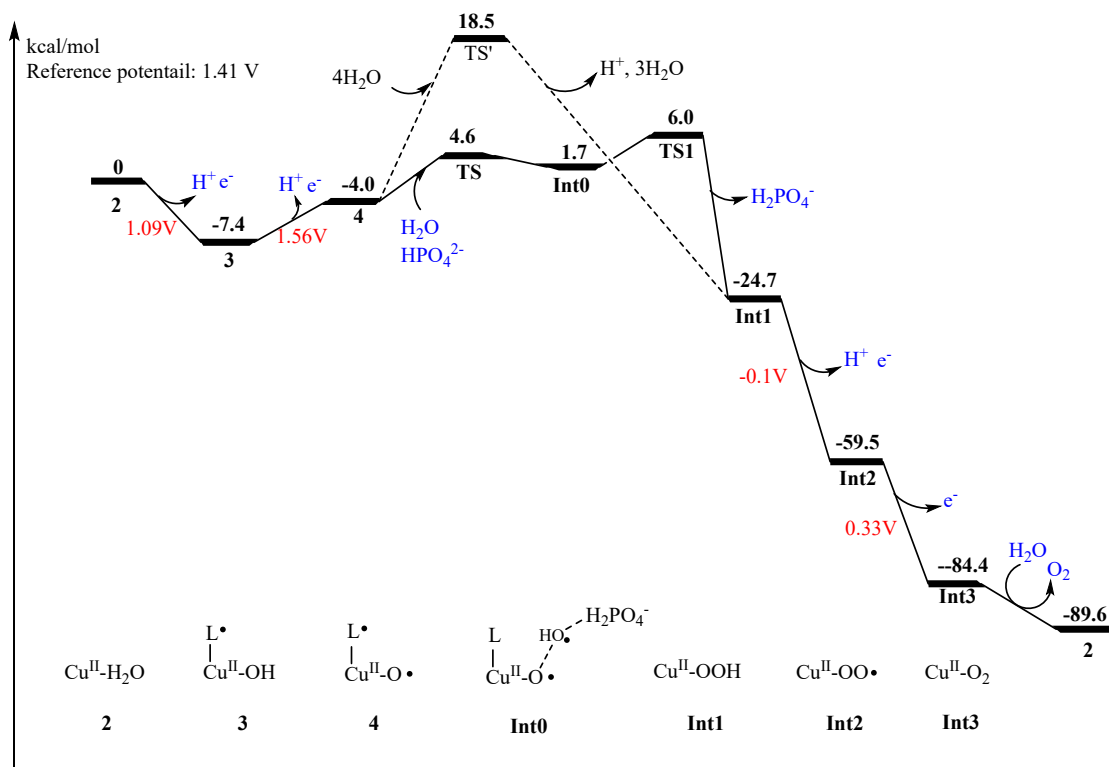

Figure S5. Energy diagram for water oxidation with M06-D3.

#### S4. Coordinates for all structures.

1(doulet)  $E_{\text{opt}} = -2728.4741576$  hartree

| Center<br>Number | Atomic<br>Number | Atomic<br>Type | Coordinates (Angstroms) |           |           |
|------------------|------------------|----------------|-------------------------|-----------|-----------|
|                  |                  |                | X                       | Y         | Z         |
| 1                | 29               | 0              | 0.084594                | -0.016131 | -0.024999 |
| 2                | 7                | 0              | 2.086351                | -0.072486 | -0.000078 |
| 3                | 7                | 0              | 0.508258                | 1.518305  | -1.445289 |
| 4                | 7                | 0              | -1.224075               | 1.543984  | 0.698693  |
| 5                | 6                | 0              | -0.470336               | 1.551364  | -2.546154 |
| 6                | 1                | 0              | -0.220934               | 2.348233  | -3.268272 |
| 7                | 1                | 0              | -1.473002               | 1.741865  | -2.142777 |
| 8                | 1                | 0              | -0.474843               | 0.581185  | -3.059598 |
| 9                | 6                | 0              | -2.334485               | 1.447705  | 1.441368  |
| 10               | 1                | 0              | -2.605788               | 0.448359  | 1.787976  |
| 11               | 6                | 0              | -2.719677               | 3.808608  | 1.270765  |
| 12               | 1                | 0              | -3.307617               | 4.701843  | 1.494116  |
| 13               | 6                | 0              | 2.754501                | 0.622036  | -0.930185 |
| 14               | 6                | 0              | -3.113425               | 2.559688  | 1.757452  |
| 15               | 1                | 0              | -4.011055               | 2.441860  | 2.366751  |
| 16               | 6                | 0              | -1.571692               | 3.901368  | 0.480379  |
| 17               | 1                | 0              | -1.242811               | 4.856333  | 0.066913  |
| 18               | 6                | 0              | -0.843744               | 2.740742  | 0.214049  |
| 19               | 6                | 0              | 0.421315                | 2.738880  | -0.608773 |
| 20               | 1                | 0              | 0.485525                | 3.642949  | -1.236423 |
| 21               | 1                | 0              | 1.285007                | 2.746283  | 0.075434  |
| 22               | 6                | 0              | 4.814712                | -0.161987 | 0.012405  |
| 23               | 1                | 0              | 5.906441                | -0.197238 | 0.017966  |
| 24               | 6                | 0              | 4.148635                | 0.612846  | -0.943164 |
| 25               | 1                | 0              | 4.694534                | 1.189939  | -1.691216 |
| 26               | 6                | 0              | 1.883021                | 1.300700  | -1.955111 |
| 27               | 1                | 0              | 2.330847                | 2.245044  | -2.306409 |
| 28               | 1                | 0              | 1.814192                | 0.630709  | -2.826236 |
| 29               | 7                | 0              | 0.388116                | -1.549868 | 1.436615  |
| 30               | 7                | 0              | -1.351715               | -1.456155 | -0.692004 |
| 31               | 6                | 0              | -0.588337               | -1.491381 | 2.538203  |
| 32               | 1                | 0              | -0.393395               | -2.289539 | 3.275439  |
| 33               | 1                | 0              | -1.602586               | -1.620979 | 2.140317  |
| 34               | 1                | 0              | -0.523986               | -0.513619 | 3.032503  |
| 35               | 6                | 0              | -2.453132               | -1.275189 | -1.432242 |
| 36               | 1                | 0              | -2.643193               | -0.258636 | -1.783095 |



|    |   |   |           |           |           |
|----|---|---|-----------|-----------|-----------|
| 37 | 6 | 0 | -3.021822 | -3.597876 | -1.247972 |
| 38 | 1 | 0 | -3.678738 | -4.443173 | -1.465389 |
| 39 | 6 | 0 | 2.698182  | -0.811115 | 0.933945  |
| 40 | 6 | 0 | -3.317900 | -2.324208 | -1.739921 |
| 41 | 1 | 0 | -4.205475 | -2.139408 | -2.347249 |
| 42 | 6 | 0 | -1.882159 | -3.777566 | -0.460484 |
| 43 | 1 | 0 | -1.628277 | -4.753639 | -0.043359 |
| 44 | 6 | 0 | -1.064046 | -2.677002 | -0.202148 |
| 45 | 6 | 0 | 0.201437  | -2.769741 | 0.615541  |
| 46 | 1 | 0 | 0.196083  | -3.669828 | 1.252174  |
| 47 | 1 | 0 | 1.057891  | -2.851320 | -0.072813 |
| 48 | 6 | 0 | 4.090249  | -0.892106 | 0.960335  |
| 49 | 1 | 0 | 4.590468  | -1.503840 | 1.712746  |
| 50 | 6 | 0 | 1.775580  | -1.434449 | 1.948555  |
| 51 | 1 | 0 | 2.153749  | -2.410993 | 2.293175  |
| 52 | 1 | 0 | 1.753950  | -0.768970 | 2.825690  |

-----

2(doulet)  $E_{\text{opt}} = -2728.8533366$  hartree

| Center<br>Number | Atomic<br>Number | Atomic<br>Type | Coordinates (Angstroms) |           |           |
|------------------|------------------|----------------|-------------------------|-----------|-----------|
|                  |                  |                | X                       | Y         | Z         |
| 1                | 29               | 0              | 0.268956                | 0.129593  | 0.768744  |
| 2                | 7                | 0              | -2.147479               | -1.396781 | 0.433230  |
| 3                | 7                | 0              | 0.234977                | -2.035647 | -0.974034 |
| 4                | 7                | 0              | 2.190536                | -0.551762 | 0.550708  |
| 5                | 6                | 0              | 0.339205                | -1.369909 | -2.267039 |
| 6                | 1                | 0              | 0.507650                | -2.087622 | -3.096806 |
| 7                | 1                | 0              | 1.172752                | -0.654055 | -2.258779 |
| 8                | 1                | 0              | -0.583765               | -0.808692 | -2.477975 |
| 9                | 6                | 0              | 3.130399                | 0.264906  | 1.063143  |
| 10               | 1                | 0              | 2.766982                | 1.160521  | 1.573269  |
| 11               | 6                | 0              | 4.880767                | -1.146646 | 0.251272  |
| 12               | 1                | 0              | 5.939087                | -1.383977 | 0.121086  |
| 13               | 6                | 0              | -2.183222               | -2.157736 | -0.665054 |
| 14               | 6                | 0              | 4.489421                | 0.001617  | 0.945213  |
| 15               | 1                | 0              | 5.217720                | 0.688677  | 1.378345  |
| 16               | 6                | 0              | 3.901913                | -1.986178 | -0.277017 |
| 17               | 1                | 0              | 4.173160                | -2.890840 | -0.824280 |
| 18               | 6                | 0              | 2.547862                | -1.674551 | -0.101759 |
| 19               | 6                | 0              | 1.480253                | -2.652325 | -0.551762 |
| 20               | 1                | 0              | 1.916982                | -3.313413 | -1.326951 |
| 21               | 1                | 0              | 1.267794                | -3.293464 | 0.320808  |

|    |   |   |           |           |           |
|----|---|---|-----------|-----------|-----------|
| 22 | 6 | 0 | -4.328518 | -1.234102 | -1.232374 |
| 23 | 1 | 0 | -5.202694 | -1.182387 | -1.885550 |
| 24 | 6 | 0 | -3.282826 | -2.115462 | -1.527102 |
| 25 | 1 | 0 | -3.305072 | -2.743492 | -2.419664 |
| 26 | 6 | 0 | -0.916678 | -2.946365 | -0.905883 |
| 27 | 1 | 0 | -0.768814 | -3.628785 | -0.055165 |
| 28 | 1 | 0 | -1.011368 | -3.567899 | -1.816457 |
| 29 | 7 | 0 | -1.476650 | 1.255062  | 1.380263  |
| 30 | 7 | 0 | 0.475907  | 1.713631  | -0.516224 |
| 31 | 6 | 0 | -0.946623 | 1.985808  | 2.554004  |
| 32 | 1 | 0 | -1.712195 | 2.660750  | 2.973535  |
| 33 | 1 | 0 | -0.071981 | 2.579272  | 2.255337  |
| 34 | 1 | 0 | -0.638679 | 1.260622  | 3.318343  |
| 35 | 6 | 0 | 1.558777  | 1.968337  | -1.271374 |
| 36 | 1 | 0 | 2.350276  | 1.219298  | -1.267933 |
| 37 | 6 | 0 | 0.632058  | 4.059169  | -1.989706 |
| 38 | 1 | 0 | 0.694310  | 4.987371  | -2.561975 |
| 39 | 6 | 0 | -3.083212 | -0.473444 | 0.671599  |
| 40 | 6 | 0 | 1.673578  | 3.127966  | -2.029362 |
| 41 | 1 | 0 | 2.568177  | 3.294681  | -2.631002 |
| 42 | 6 | 0 | -0.490727 | 3.787864  | -1.209365 |
| 43 | 1 | 0 | -1.327846 | 4.485815  | -1.155472 |
| 44 | 6 | 0 | -0.544638 | 2.592404  | -0.489025 |
| 45 | 6 | 0 | -1.774854 | 2.179569  | 0.266628  |
| 46 | 1 | 0 | -2.331783 | 3.060120  | 0.627461  |
| 47 | 1 | 0 | -2.426642 | 1.658482  | -0.452179 |
| 48 | 6 | 0 | -4.220229 | -0.372772 | -0.135190 |
| 49 | 1 | 0 | -4.980397 | 0.381783  | 0.073926  |
| 50 | 6 | 0 | -2.708614 | 0.497235  | 1.763942  |
| 51 | 1 | 0 | -3.524948 | 1.208214  | 1.969355  |
| 52 | 1 | 0 | -2.483380 | -0.047827 | 2.690718  |
| 53 | 8 | 0 | -0.172565 | -1.266386 | 2.191097  |
| 54 | 1 | 0 | 0.465761  | -1.999082 | 2.175843  |
| 55 | 1 | 0 | -0.955891 | -1.574997 | 1.629491  |

-----

3(triplet)  $E_{\text{opt}} = -2804.1802599$  hartree

| Center<br>Number | Atomic<br>Number | Atomic<br>Type | Coordinates (Angstroms) |           |           |
|------------------|------------------|----------------|-------------------------|-----------|-----------|
|                  |                  |                | X                       | Y         | Z         |
| 1                | 29               | 0              | -0.156908               | 0.308483  | -0.887170 |
| 2                | 7                | 0              | 1.895514                | -0.744581 | 0.427734  |
| 3                | 7                | 0              | -0.507579               | -1.780722 | 1.746700  |

|    |   |   |           |           |           |
|----|---|---|-----------|-----------|-----------|
| 4  | 7 | 0 | -1.997162 | -0.643068 | -0.668566 |
| 5  | 6 | 0 | -1.485917 | -1.129300 | 2.578475  |
| 6  | 1 | 0 | -1.373913 | -1.493226 | 3.613394  |
| 7  | 1 | 0 | -2.502452 | -1.301714 | 2.212313  |
| 8  | 1 | 0 | -1.269033 | -0.045487 | 2.592689  |
| 9  | 6 | 0 | -3.044956 | -0.092756 | -1.296936 |
| 10 | 1 | 0 | -2.894126 | 0.911453  | -1.701186 |
| 11 | 6 | 0 | -4.382187 | -2.044169 | -0.905196 |
| 12 | 1 | 0 | -5.318118 | -2.599270 | -0.997091 |
| 13 | 6 | 0 | 1.954179  | -1.786920 | 1.270420  |
| 14 | 6 | 0 | -4.260982 | -0.760767 | -1.437543 |
| 15 | 1 | 0 | -5.088677 | -0.277759 | -1.959026 |
| 16 | 6 | 0 | -3.286857 | -2.613971 | -0.249506 |
| 17 | 1 | 0 | -3.342671 | -3.613395 | 0.184579  |
| 18 | 6 | 0 | -2.102880 | -1.884211 | -0.152770 |
| 19 | 6 | 0 | -0.866190 | -2.442238 | 0.500581  |
| 20 | 1 | 0 | -0.987388 | -3.516169 | 0.737157  |
| 21 | 1 | 0 | -0.025982 | -2.348841 | -0.205642 |
| 22 | 6 | 0 | 4.071983  | -2.476248 | 0.384659  |
| 23 | 1 | 0 | 4.928672  | -3.153705 | 0.369651  |
| 24 | 6 | 0 | 3.015981  | -2.691580 | 1.276892  |
| 25 | 1 | 0 | 3.018004  | -3.536546 | 1.967763  |
| 26 | 6 | 0 | 0.840196  | -1.904641 | 2.281912  |
| 27 | 1 | 0 | 0.883279  | -2.883222 | 2.796258  |
| 28 | 1 | 0 | 0.952443  | -1.131484 | 3.057096  |
| 29 | 7 | 0 | 1.597207  | 1.434713  | -1.248416 |
| 30 | 7 | 0 | -0.533281 | 1.894136  | 0.388871  |
| 31 | 6 | 0 | 1.282316  | 2.211544  | -2.461382 |
| 32 | 1 | 0 | 2.145990  | 2.821219  | -2.780903 |
| 33 | 1 | 0 | 0.431539  | 2.876224  | -2.257755 |
| 34 | 1 | 0 | 1.002027  | 1.520109  | -3.266541 |
| 35 | 6 | 0 | -1.703112 | 2.160889  | 0.993606  |
| 36 | 1 | 0 | -2.508060 | 1.440720  | 0.842978  |
| 37 | 6 | 0 | -0.823070 | 4.183751  | 1.931523  |
| 38 | 1 | 0 | -0.936043 | 5.088283  | 2.533405  |
| 39 | 6 | 0 | 2.881427  | -0.560690 | -0.453294 |
| 40 | 6 | 0 | -1.890399 | 3.293579  | 1.778959  |
| 41 | 1 | 0 | -2.856118 | 3.471789  | 2.254452  |
| 42 | 6 | 0 | 0.388927  | 3.903736  | 1.301831  |
| 43 | 1 | 0 | 1.245817  | 4.573306  | 1.395227  |
| 44 | 6 | 0 | 0.504368  | 2.738355  | 0.539426  |
| 45 | 6 | 0 | 1.807649  | 2.320289  | -0.087622 |
| 46 | 1 | 0 | 2.409261  | 3.201614  | -0.366372 |
| 47 | 1 | 0 | 2.376315  | 1.771353  | 0.677257  |

|    |   |   |           |           |           |
|----|---|---|-----------|-----------|-----------|
| 48 | 6 | 0 | 4.009521  | -1.395181 | -0.489091 |
| 49 | 1 | 0 | 4.809501  | -1.199531 | -1.206141 |
| 50 | 6 | 0 | 2.740491  | 0.543695  | -1.477937 |
| 51 | 1 | 0 | 3.679550  | 1.123896  | -1.538564 |
| 52 | 1 | 0 | 2.591135  | 0.061549  | -2.453665 |
| 53 | 8 | 0 | 0.320504  | -0.972059 | -2.228898 |
| 54 | 1 | 0 | -0.470495 | -1.493054 | -2.428528 |

-----

$3_{\text{pt}}(\text{triplet}) E_{\text{opt}} = -2804.6538878$  hartree

-----

| Center<br>Number | Atomic<br>Number | Atomic<br>Type | Coordinates (Angstroms) |           |           |
|------------------|------------------|----------------|-------------------------|-----------|-----------|
|                  |                  |                | X                       | Y         | Z         |
| 1                | 29               | 0              | -0.084652               | 0.310981  | -0.864331 |
| 2                | 7                | 0              | 1.775030                | -0.852479 | 0.401225  |
| 3                | 7                | 0              | -0.734559               | -1.747859 | 1.802458  |
| 4                | 7                | 0              | -1.982822               | -0.467968 | -0.676205 |
| 5                | 6                | 0              | -1.734283               | -1.165238 | 2.661349  |
| 6                | 1                | 0              | -1.530630               | -1.458118 | 3.703358  |
| 7                | 1                | 0              | -2.742174               | -1.466602 | 2.357616  |
| 8                | 1                | 0              | -1.645475               | -0.064217 | 2.605646  |
| 9                | 6                | 0              | -2.945051               | 0.204716  | -1.325771 |
| 10               | 1                | 0              | -2.665829               | 1.179925  | -1.732716 |
| 11               | 6                | 0              | -4.515432               | -1.564720 | -0.945623 |
| 12               | 1                | 0              | -5.511042               | -2.001200 | -1.049081 |
| 13               | 6                | 0              | 1.741907                | -1.839628 | 1.313168  |
| 14               | 6                | 0              | -4.231346               | -0.308623 | -1.480030 |
| 15               | 1                | 0              | -4.985552               | 0.270627  | -2.014637 |
| 16               | 6                | 0              | -3.508465               | -2.260935 | -0.270733 |
| 17               | 1                | 0              | -3.694295               | -3.242601 | 0.167346  |
| 18               | 6                | 0              | -2.245367               | -1.682827 | -0.154374 |
| 19               | 6                | 0              | -1.104111               | -2.380250 | 0.543618  |
| 20               | 1                | 0              | -1.378583               | -3.424276 | 0.785405  |
| 21               | 1                | 0              | -0.225211               | -2.408120 | -0.114245 |
| 22               | 6                | 0              | 3.822115                | -2.730506 | 0.512680  |
| 23               | 1                | 0              | 4.624421                | -3.470315 | 0.556340  |
| 24               | 6                | 0              | 2.740106                | -2.809314 | 1.396904  |
| 25               | 1                | 0              | 2.675785                | -3.603194 | 2.142884  |
| 26               | 6                | 0              | 0.622601                | -1.807905 | 2.322997  |
| 27               | 1                | 0              | 0.662140                | -2.702136 | 2.974363  |
| 28               | 1                | 0              | 0.744227                | -0.937722 | 2.988419  |
| 29               | 7                | 0              | 1.696341                | 1.286665  | -1.285238 |
| 30               | 7                | 0              | -0.333664               | 1.896822  | 0.415553  |

|    |   |   |           |           |           |
|----|---|---|-----------|-----------|-----------|
| 31 | 6 | 0 | 1.423471  | 2.077803  | -2.502878 |
| 32 | 1 | 0 | 2.333391  | 2.603809  | -2.837770 |
| 33 | 1 | 0 | 0.639854  | 2.815780  | -2.285825 |
| 34 | 1 | 0 | 1.071852  | 1.407795  | -3.297742 |
| 35 | 6 | 0 | -1.464676 | 2.228685  | 1.060710  |
| 36 | 1 | 0 | -2.324225 | 1.573510  | 0.917488  |
| 37 | 6 | 0 | -0.409441 | 4.158790  | 2.014812  |
| 38 | 1 | 0 | -0.437021 | 5.051411  | 2.643675  |
| 39 | 6 | 0 | 2.799300  | -0.784602 | -0.455374 |
| 40 | 6 | 0 | -1.542576 | 3.351227  | 1.877577  |
| 41 | 1 | 0 | -2.476984 | 3.584503  | 2.390081  |
| 42 | 6 | 0 | 0.758063  | 3.812966  | 1.336045  |
| 43 | 1 | 0 | 1.663067  | 4.417659  | 1.415391  |
| 44 | 6 | 0 | 0.766061  | 2.662597  | 0.544438  |
| 45 | 6 | 0 | 2.010571  | 2.167541  | -0.135376 |
| 46 | 1 | 0 | 2.648523  | 3.006220  | -0.456798 |
| 47 | 1 | 0 | 2.583724  | 1.593672  | 0.606735  |
| 48 | 6 | 0 | 3.861097  | -1.700099 | -0.420895 |
| 49 | 1 | 0 | 4.688844  | -1.601387 | -1.125934 |
| 50 | 6 | 0 | 2.762968  | 0.296948  | -1.513896 |
| 51 | 1 | 0 | 3.744235  | 0.799291  | -1.578166 |
| 52 | 1 | 0 | 2.581924  | -0.177962 | -2.489534 |
| 53 | 8 | 0 | 0.108350  | -0.996436 | -2.509102 |
| 54 | 1 | 0 | -0.743812 | -1.418262 | -2.714237 |
| 55 | 1 | 0 | 0.699625  | -1.741058 | -2.300298 |

-----

4(doublet)  $E_{\text{opt}} = -2803.5010593$  hartree

-----

| Center<br>Number | Atomic<br>Number | Atomic<br>Type | Coordinates (Angstroms) |           |           |
|------------------|------------------|----------------|-------------------------|-----------|-----------|
|                  |                  |                | X                       | Y         | Z         |
| 1                | 29               | 0              | -0.123414               | -0.468384 | -0.907881 |
| 2                | 7                | 0              | -0.923203               | 1.470302  | 0.072886  |
| 3                | 7                | 0              | 2.056450                | 2.193119  | 0.767294  |
| 4                | 7                | 0              | 1.936727                | -0.827107 | -0.700393 |
| 5                | 6                | 0              | 2.698195                | 3.408275  | 1.201641  |
| 6                | 1                | 0              | 3.281453                | 3.188949  | 2.116047  |
| 7                | 1                | 0              | 1.928544                | 4.147413  | 1.482205  |
| 8                | 1                | 0              | 3.355759                | 3.804031  | 0.421111  |
| 9                | 6                | 0              | 2.336546                | -2.107915 | -0.756717 |
| 10               | 1                | 0              | 1.563034                | -2.846261 | -0.979115 |
| 11               | 6                | 0              | 4.593280                | -1.494247 | -0.233746 |
| 12               | 1                | 0              | 5.637709                | -1.750816 | -0.043625 |

|    |   |   |           |           |           |
|----|---|---|-----------|-----------|-----------|
| 13 | 6 | 0 | -0.372580 | 2.186751  | 1.052398  |
| 14 | 6 | 0 | 3.658813  | -2.485605 | -0.534956 |
| 15 | 1 | 0 | 3.939349  | -3.538337 | -0.593464 |
| 16 | 6 | 0 | 4.176423  | -0.162390 | -0.191123 |
| 17 | 1 | 0 | 4.880294  | 0.644888  | 0.018095  |
| 18 | 6 | 0 | 2.835649  | 0.139918  | -0.442768 |
| 19 | 6 | 0 | 2.385587  | 1.591742  | -0.510152 |
| 20 | 1 | 0 | 3.170647  | 2.195633  | -0.976877 |
| 21 | 1 | 0 | 1.482676  | 1.622125  | -1.157771 |
| 22 | 6 | 0 | -2.186978 | 3.748140  | 0.977719  |
| 23 | 1 | 0 | -2.690571 | 4.647155  | 1.339797  |
| 24 | 6 | 0 | -0.970539 | 3.350291  | 1.542252  |
| 25 | 1 | 0 | -0.501705 | 3.919753  | 2.346222  |
| 26 | 6 | 0 | 0.963604  | 1.670298  | 1.581454  |
| 27 | 1 | 0 | 1.123398  | 1.995157  | 2.616236  |
| 28 | 1 | 0 | 0.971241  | 0.573217  | 1.528006  |
| 29 | 7 | 0 | -2.231658 | -0.453588 | -1.364159 |
| 30 | 7 | 0 | -0.770027 | -1.660600 | 0.654052  |
| 31 | 6 | 0 | -2.379325 | -1.285974 | -2.567521 |
| 32 | 1 | 0 | -3.423387 | -1.291884 | -2.928738 |
| 33 | 1 | 0 | -2.075709 | -2.314687 | -2.327375 |
| 34 | 1 | 0 | -1.717214 | -0.899497 | -3.352547 |
| 35 | 6 | 0 | 0.016979  | -2.273629 | 1.556440  |
| 36 | 1 | 0 | 1.083778  | -2.053876 | 1.507035  |
| 37 | 6 | 0 | -1.863205 | -3.387110 | 2.538865  |
| 38 | 1 | 0 | -2.295331 | -4.072994 | 3.271028  |
| 39 | 6 | 0 | -2.083077 | 1.839640  | -0.479861 |
| 40 | 6 | 0 | -0.487210 | -3.139298 | 2.520067  |
| 41 | 1 | 0 | 0.189361  | -3.610544 | 3.234552  |
| 42 | 6 | 0 | -2.678725 | -2.737867 | 1.614700  |
| 43 | 1 | 0 | -3.759573 | -2.890370 | 1.606566  |
| 44 | 6 | 0 | -2.100766 | -1.861373 | 0.690668  |
| 45 | 6 | 0 | -2.962459 | -1.016990 | -0.212582 |
| 46 | 1 | 0 | -3.846761 | -1.584291 | -0.545115 |
| 47 | 1 | 0 | -3.345145 | -0.191897 | 0.409025  |
| 48 | 6 | 0 | -2.756448 | 2.985924  | -0.043981 |
| 49 | 1 | 0 | -3.708158 | 3.267687  | -0.498253 |
| 50 | 6 | 0 | -2.585499 | 0.956351  | -1.602949 |
| 51 | 1 | 0 | -3.673263 | 1.083073  | -1.740207 |
| 52 | 1 | 0 | -2.091555 | 1.268656  | -2.537025 |
| 53 | 8 | 0 | 0.274066  | 0.458298  | -2.511765 |

---

4<sub>pt</sub>(doublet) E<sub>opt</sub> = -2803.9677673 hartree

---

| Center<br>Number | Atomic<br>Number | Atomic<br>Type | Coordinates (Angstroms) |           |           |
|------------------|------------------|----------------|-------------------------|-----------|-----------|
|                  |                  |                | X                       | Y         | Z         |
| 1                | 29               | 0              | -0.327344               | 0.283263  | -0.851558 |
| 2                | 7                | 0              | 2.004223                | -1.030587 | -0.131550 |
| 3                | 7                | 0              | -0.034126               | -2.258332 | 1.333577  |
| 4                | 7                | 0              | -2.027433               | -0.716160 | -0.658649 |
| 5                | 6                | 0              | -0.435217               | -1.258374 | 2.281594  |
| 6                | 1                | 0              | -0.111313               | -1.560717 | 3.288617  |
| 7                | 1                | 0              | -1.516548               | -1.088375 | 2.243573  |
| 8                | 1                | 0              | 0.094121                | -0.317973 | 2.034239  |
| 9                | 6                | 0              | -3.114814               | -0.073837 | -1.107335 |
| 10               | 1                | 0              | -2.955367               | 0.906796  | -1.561426 |
| 11               | 6                | 0              | -4.510117               | -1.871703 | -0.359250 |
| 12               | 1                | 0              | -5.491437               | -2.331973 | -0.227453 |
| 13               | 6                | 0              | 2.367577                | -1.886885 | 0.822915  |
| 14               | 6                | 0              | -4.385357               | -0.630133 | -0.979301 |
| 15               | 1                | 0              | -5.250509               | -0.083441 | -1.356422 |
| 16               | 6                | 0              | -3.361173               | -2.533793 | 0.081942  |
| 17               | 1                | 0              | -3.419921               | -3.517687 | 0.549653  |
| 18               | 6                | 0              | -2.111102               | -1.940274 | -0.092695 |
| 19               | 6                | 0              | -0.850103               | -2.699466 | 0.218532  |
| 20               | 1                | 0              | -1.091909               | -3.761050 | 0.412645  |
| 21               | 1                | 0              | -0.202269               | -2.705274 | -0.673353 |
| 22               | 6                | 0              | 4.657212                | -1.194728 | 0.668085  |
| 23               | 1                | 0              | 5.700384                | -1.258317 | 0.985064  |
| 24               | 6                | 0              | 3.690628                | -2.003285 | 1.264436  |
| 25               | 1                | 0              | 3.948221                | -2.708389 | 2.056585  |
| 26               | 6                | 0              | 1.306528                | -2.811323 | 1.415820  |
| 27               | 1                | 0              | 1.317887                | -3.769000 | 0.874999  |
| 28               | 1                | 0              | 1.536217                | -3.000955 | 2.474008  |
| 29               | 7                | 0              | 1.224557                | 1.483386  | -1.305769 |
| 30               | 7                | 0              | -0.720459               | 1.642499  | 0.542963  |
| 31               | 6                | 0              | 0.696153                | 2.316211  | -2.415958 |
| 32               | 1                | 0              | 1.483777                | 3.009019  | -2.750899 |
| 33               | 1                | 0              | -0.174216               | 2.885201  | -2.066605 |
| 34               | 1                | 0              | 0.402794                | 1.655973  | -3.240601 |
| 35               | 6                | 0              | -1.851660               | 1.739135  | 1.264239  |
| 36               | 1                | 0              | -2.595630               | 0.953093  | 1.147268  |
| 37               | 6                | 0              | -1.079399               | 3.782453  | 2.258768  |
| 38               | 1                | 0              | -1.224477               | 4.632203  | 2.929008  |
| 39               | 6                | 0              | 2.926415                | -0.230323 | -0.686798 |

|    |   |   |           |           |           |
|----|---|---|-----------|-----------|-----------|
| 40 | 6 | 0 | -2.063142 | 2.797655  | 2.139030  |
| 41 | 1 | 0 | -2.990943 | 2.840491  | 2.710641  |
| 42 | 6 | 0 | 0.093422  | 3.669339  | 1.512916  |
| 43 | 1 | 0 | 0.888776  | 4.412947  | 1.578364  |
| 44 | 6 | 0 | 0.251050  | 2.574209  | 0.666265  |
| 45 | 6 | 0 | 1.505589  | 2.295855  | -0.088146 |
| 46 | 1 | 0 | 2.034853  | 3.216125  | -0.378219 |
| 47 | 1 | 0 | 2.175026  | 1.722022  | 0.569967  |
| 48 | 6 | 0 | 4.272489  | -0.284375 | -0.319436 |
| 49 | 1 | 0 | 4.996687  | 0.384291  | -0.787869 |
| 50 | 6 | 0 | 2.434051  | 0.737963  | -1.736425 |
| 51 | 1 | 0 | 3.214357  | 1.478769  | -1.971687 |
| 52 | 1 | 0 | 2.179501  | 0.208439  | -2.664524 |
| 53 | 8 | 0 | 0.011023  | -0.733840 | -2.344949 |
| 54 | 1 | 0 | 0.695223  | -1.357702 | -2.039979 |

-----  
TS0(quartet) E<sub>opt</sub> = -3522.812844 hartree  
-----

| Center<br>Number | Atomic<br>Number | Atomic<br>Type | Coordinates (Angstroms) |           |           |
|------------------|------------------|----------------|-------------------------|-----------|-----------|
|                  |                  |                | X                       | Y         | Z         |
| 1                | 29               | 0              | -0.151726               | -0.043839 | -0.353681 |
| 2                | 7                | 0              | -2.241066               | -1.180323 | -0.139915 |
| 3                | 7                | 0              | -3.753687               | 1.610449  | 0.312615  |
| 4                | 7                | 0              | -0.372831               | 2.066320  | -0.058084 |
| 5                | 6                | 0              | -5.084479               | 1.425347  | -0.253955 |
| 6                | 1                | 0              | -5.799453               | 1.180445  | 0.545985  |
| 7                | 1                | 0              | -5.137396               | 0.617871  | -1.012665 |
| 8                | 1                | 0              | -5.416446               | 2.357640  | -0.735922 |
| 9                | 6                | 0              | 0.714989                | 2.758851  | 0.333908  |
| 10               | 1                | 0              | 1.656662                | 2.205738  | 0.318929  |
| 11               | 6                | 0              | -0.584876               | 4.745549  | 0.667669  |
| 12               | 1                | 0              | -0.676911               | 5.794694  | 0.958286  |
| 13               | 6                | 0              | -3.340896               | -0.845037 | 0.552133  |
| 14               | 6                | 0              | 0.651883                | 4.097739  | 0.704822  |
| 15               | 1                | 0              | 1.560982                | 4.614816  | 1.016414  |
| 16               | 6                | 0              | -1.697659               | 4.034080  | 0.227165  |
| 17               | 1                | 0              | -2.676045               | 4.511495  | 0.151263  |
| 18               | 6                | 0              | -1.565534               | 2.690479  | -0.148885 |
| 19               | 6                | 0              | -2.765806               | 1.955630  | -0.703363 |
| 20               | 1                | 0              | -3.252845               | 2.632845  | -1.419948 |
| 21               | 1                | 0              | -2.418756               | 1.082688  | -1.292696 |
| 22               | 6                | 0              | -4.416037               | -2.895581 | -0.120828 |
| 23               | 1                | 0              | -5.271671               | -3.574845 | -0.106374 |



|    |    |   |           |           |           |
|----|----|---|-----------|-----------|-----------|
| 24 | 6  | 0 | -4.456865 | -1.692467 | 0.585310  |
| 25 | 1  | 0 | -5.340094 | -1.405307 | 1.158550  |
| 26 | 6  | 0 | -3.345391 | 0.519029  | 1.210949  |
| 27 | 1  | 0 | -4.032505 | 0.507046  | 2.070362  |
| 28 | 1  | 0 | -2.334049 | 0.733304  | 1.587461  |
| 29 | 7  | 0 | 0.263850  | -2.081991 | -0.833884 |
| 30 | 7  | 0 | 0.632739  | -0.596849 | 1.466312  |
| 31 | 6  | 0 | 1.486442  | -2.147160 | -1.657909 |
| 32 | 1  | 0 | 1.605574  | -3.157541 | -2.086939 |
| 33 | 1  | 0 | 2.353060  | -1.933600 | -1.025550 |
| 34 | 1  | 0 | 1.434469  | -1.407887 | -2.465674 |
| 35 | 6  | 0 | 1.010396  | 0.243708  | 2.442820  |
| 36 | 1  | 0 | 0.668079  | 1.275449  | 2.362573  |
| 37 | 6  | 0 | 2.205595  | -1.502030 | 3.568435  |
| 38 | 1  | 0 | 2.835508  | -1.857570 | 4.386904  |
| 39 | 6  | 0 | -2.191844 | -2.333733 | -0.820607 |
| 40 | 6  | 0 | 1.791387  | -0.168680 | 3.517000  |
| 41 | 1  | 0 | 2.073840  | 0.548682  | 4.288852  |
| 42 | 6  | 0 | 1.804126  | -2.374248 | 2.558456  |
| 43 | 1  | 0 | 2.106080  | -3.422737 | 2.559691  |
| 44 | 6  | 0 | 1.009158  | -1.889608 | 1.518209  |
| 45 | 6  | 0 | 0.457224  | -2.792473 | 0.450261  |
| 46 | 1  | 0 | 1.095480  | -3.679389 | 0.312230  |
| 47 | 1  | 0 | -0.518078 | -3.156106 | 0.808279  |
| 48 | 6  | 0 | -3.264650 | -3.228205 | -0.837641 |
| 49 | 1  | 0 | -3.188286 | -4.166246 | -1.390693 |
| 50 | 6  | 0 | -0.905852 | -2.605293 | -1.566270 |
| 51 | 1  | 0 | -0.789241 | -3.686100 | -1.755426 |
| 52 | 1  | 0 | -0.936624 | -2.099860 | -2.544542 |
| 53 | 8  | 0 | -0.491929 | 0.312787  | -2.238780 |
| 54 | 8  | 0 | 1.382237  | 1.243478  | -2.681683 |
| 55 | 1  | 0 | 2.017439  | 1.000466  | -1.771978 |
| 56 | 1  | 0 | 0.952765  | 2.082509  | -2.441218 |
| 57 | 15 | 0 | 4.068675  | -0.015933 | -0.682510 |
| 58 | 8  | 0 | 2.714638  | 0.806913  | -0.702241 |
| 59 | 8  | 0 | 5.214493  | 1.114293  | -0.218283 |
| 60 | 1  | 0 | 5.354989  | 1.745107  | -0.941331 |
| 61 | 8  | 0 | 4.081576  | -1.027563 | 0.466695  |
| 62 | 8  | 0 | 4.433047  | -0.516397 | -2.080183 |

-----  
Int0(quartet) E<sub>opt</sub> = -3522.8175612 hartree  
-----

| Center<br>Number | Atomic<br>Number | Atomic<br>Type | Coordinates (Angstroms) |   |   |
|------------------|------------------|----------------|-------------------------|---|---|
|                  |                  |                | X                       | Y | Z |

---

|    |    |   |           |           |           |
|----|----|---|-----------|-----------|-----------|
| 1  | 29 | 0 | -0.190405 | -0.007559 | -0.408996 |
| 2  | 7  | 0 | -2.198139 | -1.248282 | -0.147336 |
| 3  | 7  | 0 | -3.839436 | 1.490600  | 0.422670  |
| 4  | 7  | 0 | -0.533363 | 2.060673  | -0.094088 |
| 5  | 6  | 0 | -5.202052 | 1.276442  | -0.052777 |
| 6  | 1  | 0 | -5.852610 | 0.998483  | 0.790433  |
| 7  | 1  | 0 | -5.289950 | 0.482109  | -0.822333 |
| 8  | 1  | 0 | -5.593073 | 2.207539  | -0.491194 |
| 9  | 6  | 0 | 0.544468  | 2.798033  | 0.239904  |
| 10 | 1  | 0 | 1.497546  | 2.269197  | 0.275332  |
| 11 | 6  | 0 | -0.782632 | 4.781763  | 0.444464  |
| 12 | 1  | 0 | -0.888997 | 5.847895  | 0.658097  |
| 13 | 6  | 0 | -3.303907 | -0.958027 | 0.556016  |
| 14 | 6  | 0 | 0.465032  | 4.158136  | 0.516612  |
| 15 | 1  | 0 | 1.368664  | 4.709252  | 0.782171  |
| 16 | 6  | 0 | -1.887822 | 4.021036  | 0.073346  |
| 17 | 1  | 0 | -2.876011 | 4.475076  | -0.019373 |
| 18 | 6  | 0 | -1.738998 | 2.655684  | -0.208787 |
| 19 | 6  | 0 | -2.938446 | 1.859463  | -0.671636 |
| 20 | 1  | 0 | -3.504589 | 2.503880  | -1.358831 |
| 21 | 1  | 0 | -2.595686 | 0.993612  | -1.267136 |
| 22 | 6  | 0 | -4.325090 | -3.020533 | -0.162737 |
| 23 | 1  | 0 | -5.162385 | -3.722516 | -0.162208 |
| 24 | 6  | 0 | -4.396690 | -1.835763 | 0.571605  |
| 25 | 1  | 0 | -5.284828 | -1.587401 | 1.155247  |
| 26 | 6  | 0 | -3.337772 | 0.385797  | 1.256334  |
| 27 | 1  | 0 | -3.976694 | 0.315380  | 2.149460  |
| 28 | 1  | 0 | -2.317677 | 0.631488  | 1.587740  |
| 29 | 7  | 0 | 0.327112  | -2.040015 | -0.870846 |
| 30 | 7  | 0 | 0.613874  | -0.522860 | 1.419801  |
| 31 | 6  | 0 | 1.552398  | -2.057654 | -1.689792 |
| 32 | 1  | 0 | 1.714165  | -3.060448 | -2.123580 |
| 33 | 1  | 0 | 2.407323  | -1.819985 | -1.050427 |
| 34 | 1  | 0 | 1.479572  | -1.313313 | -2.490814 |
| 35 | 6  | 0 | 0.920251  | 0.330925  | 2.410258  |
| 36 | 1  | 0 | 0.541077  | 1.348546  | 2.316281  |
| 37 | 6  | 0 | 2.137666  | -1.366109 | 3.584795  |
| 38 | 1  | 0 | 2.748503  | -1.696908 | 4.427762  |
| 39 | 6  | 0 | -2.117105 | -2.384984 | -0.852184 |
| 40 | 6  | 0 | 1.674404  | -0.049644 | 3.514775  |
| 41 | 1  | 0 | 1.897903  | 0.678469  | 4.295886  |
| 42 | 6  | 0 | 1.806992  | -2.253488 | 2.562843  |
| 43 | 1  | 0 | 2.145854  | -3.290530 | 2.579198  |

|    |    |   |           |           |           |
|----|----|---|-----------|-----------|-----------|
| 44 | 6  | 0 | 1.033076  | -1.800745 | 1.491964  |
| 45 | 6  | 0 | 0.546004  | -2.733557 | 0.417133  |
| 46 | 1  | 0 | 1.234927  | -3.583955 | 0.291602  |
| 47 | 1  | 0 | -0.410103 | -3.151948 | 0.767109  |
| 48 | 6  | 0 | -3.166049 | -3.307119 | -0.887327 |
| 49 | 1  | 0 | -3.065838 | -4.231464 | -1.459404 |
| 50 | 6  | 0 | -0.822054 | -2.608002 | -1.601017 |
| 51 | 1  | 0 | -0.668109 | -3.684546 | -1.790102 |
| 52 | 1  | 0 | -0.873907 | -2.103264 | -2.578647 |
| 53 | 8  | 0 | -0.492171 | 0.337633  | -2.278480 |
| 54 | 8  | 0 | 1.465593  | 1.186270  | -2.630040 |
| 55 | 1  | 0 | 2.364505  | 0.954979  | -1.360150 |
| 56 | 1  | 0 | 1.021103  | 2.017065  | -2.385716 |
| 57 | 15 | 0 | 4.242747  | -0.013001 | -0.568640 |
| 58 | 8  | 0 | 2.908615  | 0.923080  | -0.499230 |
| 59 | 8  | 0 | 5.421624  | 1.047233  | -0.099510 |
| 60 | 1  | 0 | 5.599481  | 1.687072  | -0.807357 |
| 61 | 8  | 0 | 4.179151  | -1.042045 | 0.546719  |
| 62 | 8  | 0 | 4.474688  | -0.450954 | -2.003548 |

-----  
TS1(doublet) E<sub>opt</sub> = -3522.808217 hartree  
-----

| Center<br>Number | Atomic<br>Number | Atomic<br>Type | Coordinates (Angstroms) |           |           |
|------------------|------------------|----------------|-------------------------|-----------|-----------|
|                  |                  |                | X                       | Y         | Z         |
| 1                | 29               | 0              | -0.202899               | -0.009847 | -0.408195 |
| 2                | 7                | 0              | -2.205022               | -1.256061 | -0.143500 |
| 3                | 7                | 0              | -3.851610               | 1.483393  | 0.393701  |
| 4                | 7                | 0              | -0.537080               | 2.065068  | -0.088979 |
| 5                | 6                | 0              | -5.205022               | 1.259288  | -0.102959 |
| 6                | 1                | 0              | -5.868219               | 0.982835  | 0.730887  |
| 7                | 1                | 0              | -5.276031               | 0.460007  | -0.869208 |
| 8                | 1                | 0              | -5.593620               | 2.185663  | -0.553433 |
| 9                | 6                | 0              | 0.532414                | 2.808324  | 0.259004  |
| 10               | 1                | 0              | 1.490697                | 2.289760  | 0.297029  |
| 11               | 6                | 0              | -0.809979               | 4.781810  | 0.465018  |
| 12               | 1                | 0              | -0.925278               | 5.845918  | 0.684040  |
| 13               | 6                | 0              | -3.315283               | -0.964851 | 0.551905  |
| 14               | 6                | 0              | 0.441156                | 4.166018  | 0.544262  |
| 15               | 1                | 0              | 1.338791                | 4.721665  | 0.820529  |
| 16               | 6                | 0              | -1.906355               | 4.015991  | 0.078780  |
| 17               | 1                | 0              | -2.896664               | 4.463966  | -0.020565 |
| 18               | 6                | 0              | -1.745400               | 2.653376  | -0.210320 |
| 19               | 6                | 0              | -2.935059               | 1.851290  | -0.688483 |

|    |    |   |           |           |           |
|----|----|---|-----------|-----------|-----------|
| 20 | 1  | 0 | -3.493199 | 2.491966  | -1.385864 |
| 21 | 1  | 0 | -2.578304 | 0.985770  | -1.275834 |
| 22 | 6  | 0 | -4.323730 | -3.037945 | -0.154003 |
| 23 | 1  | 0 | -5.157714 | -3.743881 | -0.151243 |
| 24 | 6  | 0 | -4.404495 | -1.847046 | 0.569457  |
| 25 | 1  | 0 | -5.296883 | -1.597439 | 1.146126  |
| 26 | 6  | 0 | -3.358581 | 0.384800  | 1.240836  |
| 27 | 1  | 0 | -4.007844 | 0.320125  | 2.126996  |
| 28 | 1  | 0 | -2.342780 | 0.634470  | 1.582399  |
| 29 | 7  | 0 | 0.328621  | -2.043941 | -0.864238 |
| 30 | 7  | 0 | 0.589971  | -0.523423 | 1.429958  |
| 31 | 6  | 0 | 1.550454  | -2.051402 | -1.688959 |
| 32 | 1  | 0 | 1.707729  | -3.046884 | -2.141169 |
| 33 | 1  | 0 | 2.409516  | -1.828670 | -1.049399 |
| 34 | 1  | 0 | 1.475540  | -1.293907 | -2.477769 |
| 35 | 6  | 0 | 0.881096  | 0.332296  | 2.423140  |
| 36 | 1  | 0 | 0.475918  | 1.340680  | 2.336671  |
| 37 | 6  | 0 | 2.155387  | -1.337172 | 3.576762  |
| 38 | 1  | 0 | 2.783851  | -1.655440 | 4.411575  |
| 39 | 6  | 0 | -2.115923 | -2.397081 | -0.840304 |
| 40 | 6  | 0 | 1.653499  | -0.034314 | 3.520103  |
| 41 | 1  | 0 | 1.862704  | 0.694668  | 4.304400  |
| 42 | 6  | 0 | 1.839412  | -2.227825 | 2.552518  |
| 43 | 1  | 0 | 2.206387  | -3.255327 | 2.559957  |
| 44 | 6  | 0 | 1.040715  | -1.791289 | 1.493426  |
| 45 | 6  | 0 | 0.556777  | -2.732057 | 0.423838  |
| 46 | 1  | 0 | 1.248519  | -3.580564 | 0.300362  |
| 47 | 1  | 0 | -0.396787 | -3.151929 | 0.779338  |
| 48 | 6  | 0 | -3.160320 | -3.324775 | -0.871491 |
| 49 | 1  | 0 | -3.053758 | -4.253002 | -1.436133 |
| 50 | 6  | 0 | -0.820230 | -2.617146 | -1.589519 |
| 51 | 1  | 0 | -0.663767 | -3.693455 | -1.778630 |
| 52 | 1  | 0 | -0.876639 | -2.111102 | -2.566012 |
| 53 | 8  | 0 | -0.463179 | 0.326348  | -2.268930 |
| 54 | 8  | 0 | 1.534526  | 1.289131  | -2.669553 |
| 55 | 1  | 0 | 2.386778  | 0.947591  | -1.298049 |
| 56 | 1  | 0 | 1.024864  | 2.063667  | -2.365556 |
| 57 | 15 | 0 | 4.261927  | -0.025030 | -0.576381 |
| 58 | 8  | 0 | 2.905994  | 0.883521  | -0.440515 |
| 59 | 8  | 0 | 5.418376  | 1.025543  | -0.041851 |
| 60 | 1  | 0 | 5.606981  | 1.693071  | -0.720905 |
| 61 | 8  | 0 | 4.216275  | -1.123426 | 0.470599  |
| 62 | 8  | 0 | 4.486386  | -0.359388 | -2.038976 |

TS'( doubelt)  $E_{\text{opt}} = -3109.033305$  hartree

| Center<br>Number | Atomic<br>Number | Atomic<br>Type | Coordinates (Angstroms) |           |           |
|------------------|------------------|----------------|-------------------------|-----------|-----------|
|                  |                  |                | X                       | Y         | Z         |
| 1                | 29               | 0              | 0.325094                | -0.290178 | -0.068559 |
| 2                | 7                | 0              | -1.978074               | -0.382693 | -0.264588 |
| 3                | 7                | 0              | -2.057631               | 2.815379  | 0.497042  |
| 4                | 7                | 0              | 1.099477                | 1.503839  | 0.390133  |
| 5                | 6                | 0              | -3.203722               | 3.438790  | -0.158501 |
| 6                | 1                | 0              | -4.048617               | 3.498930  | 0.544192  |
| 7                | 1                | 0              | -3.552406               | 2.896568  | -1.061351 |
| 8                | 1                | 0              | -2.944031               | 4.463196  | -0.466658 |
| 9                | 6                | 0              | 2.357821                | 1.468880  | 0.864924  |
| 10               | 1                | 0              | 2.837414                | 0.490210  | 0.900753  |
| 11               | 6                | 0              | 2.319926                | 3.832848  | 1.233612  |
| 12               | 1                | 0              | 2.792451                | 4.757575  | 1.572378  |
| 13               | 6                | 0              | -2.901705               | 0.448840  | 0.242736  |
| 14               | 6                | 0              | 3.008375                | 2.618558  | 1.294095  |
| 15               | 1                | 0              | 4.029757                | 2.552029  | 1.671386  |
| 16               | 6                | 0              | 1.028808                | 3.852225  | 0.711714  |
| 17               | 1                | 0              | 0.473352                | 4.787143  | 0.620134  |
| 18               | 6                | 0              | 0.431056                | 2.667018  | 0.262398  |
| 19               | 6                | 0              | -0.920239               | 2.709609  | -0.420893 |
| 20               | 1                | 0              | -0.917821               | 3.612325  | -1.046972 |
| 21               | 1                | 0              | -0.990677               | 1.850912  | -1.108415 |
| 22               | 6                | 0              | -4.613757               | -0.705596 | -1.002775 |
| 23               | 1                | 0              | -5.659777               | -0.835168 | -1.290225 |
| 24               | 6                | 0              | -4.249130               | 0.308533  | -0.113625 |
| 25               | 1                | 0              | -4.996406               | 0.981743  | 0.309733  |
| 26               | 6                | 0              | -2.400191               | 1.547988  | 1.162134  |
| 27               | 1                | 0              | -3.167390               | 1.760929  | 1.921214  |
| 28               | 1                | 0              | -1.506135               | 1.174611  | 1.683306  |
| 29               | 7                | 0              | -0.062259               | -2.237889 | -0.621701 |
| 30               | 7                | 0              | 0.382637                | -1.040832 | 1.797421  |
| 31               | 6                | 0              | 1.196142                | -2.793422 | -1.163119 |
| 32               | 1                | 0              | 1.011008                | -3.791217 | -1.593829 |
| 33               | 1                | 0              | 1.917102                | -2.877856 | -0.342161 |
| 34               | 1                | 0              | 1.595588                | -2.121757 | -1.926018 |
| 35               | 6                | 0              | 0.732930                | -0.381562 | 2.915384  |
| 36               | 1                | 0              | 0.928682                | 0.686052  | 2.823592  |
| 37               | 6                | 0              | 0.571237                | -2.394312 | 4.209695  |
| 38               | 1                | 0              | 0.656198                | -2.931562 | 5.156715  |
| 39               | 6                | 0              | -2.312892               | -1.361839 | -1.111455 |

|    |   |   |           |           |           |
|----|---|---|-----------|-----------|-----------|
| 40 | 6 | 0 | 0.833579  | -1.023290 | 4.144341  |
| 41 | 1 | 0 | 1.116958  | -0.451325 | 5.028894  |
| 42 | 6 | 0 | 0.189552  | -3.068429 | 3.050778  |
| 43 | 1 | 0 | -0.041609 | -4.134705 | 3.060603  |
| 44 | 6 | 0 | 0.086345  | -2.355699 | 1.855174  |
| 45 | 6 | 0 | -0.475540 | -2.966679 | 0.610385  |
| 46 | 1 | 0 | -0.207997 | -4.030155 | 0.519740  |
| 47 | 1 | 0 | -1.571021 | -2.920117 | 0.698798  |
| 48 | 6 | 0 | -3.635536 | -1.564514 | -1.509881 |
| 49 | 1 | 0 | -3.887953 | -2.379163 | -2.191185 |
| 50 | 6 | 0 | -1.168451 | -2.226106 | -1.603524 |
| 51 | 1 | 0 | -1.510783 | -3.258435 | -1.785920 |
| 52 | 1 | 0 | -0.780949 | -1.834456 | -2.553019 |
| 53 | 8 | 0 | 0.446045  | 0.147958  | -1.851055 |
| 54 | 8 | 0 | 1.626991  | 1.572009  | -2.518426 |
| 55 | 1 | 0 | 1.195561  | 1.611514  | -3.390193 |
| 56 | 8 | 0 | 3.502919  | -0.154073 | -2.923453 |
| 57 | 1 | 0 | 2.890769  | -0.729668 | -3.433565 |
| 58 | 1 | 0 | 3.599569  | -0.591451 | -2.043423 |
| 59 | 8 | 0 | 1.273796  | -1.157756 | -4.199952 |
| 60 | 1 | 0 | 1.029335  | -2.092164 | -4.117719 |
| 61 | 1 | 0 | 0.885020  | -0.742694 | -3.401364 |
| 62 | 8 | 0 | 3.818223  | -1.161412 | -0.384213 |
| 63 | 1 | 0 | 4.626300  | -0.715812 | -0.082140 |
| 64 | 1 | 0 | 4.074283  | -2.095810 | -0.443964 |
| 65 | 1 | 0 | 2.416024  | 0.935453  | -2.658057 |

-----

Int1(doublet) E<sub>opt</sub> = -2879.4547845 hartree

| Center<br>Number | Atomic<br>Number | Atomic<br>Type | Coordinates (Angstroms) |           |           |
|------------------|------------------|----------------|-------------------------|-----------|-----------|
|                  |                  |                | X                       | Y         | Z         |
| 1                | 29               | 0              | 0.111927                | -0.440674 | 0.741386  |
| 2                | 7                | 0              | 0.960599                | 1.485549  | -0.128209 |
| 3                | 7                | 0              | -2.081462               | 2.200542  | -1.225153 |
| 4                | 7                | 0              | -1.924435               | -0.752339 | 0.411809  |
| 5                | 6                | 0              | -2.215823               | 3.653552  | -1.244423 |
| 6                | 1                | 0              | -1.994385               | 4.036655  | -2.252308 |
| 7                | 1                | 0              | -1.545394               | 4.175629  | -0.530669 |
| 8                | 1                | 0              | -3.250119               | 3.935753  | -0.993707 |
| 9                | 6                | 0              | -2.336454               | -2.028839 | 0.515173  |
| 10               | 1                | 0              | -1.571352               | -2.762686 | 0.779932  |
| 11               | 6                | 0              | -4.578078               | -1.425141 | -0.063331 |

|    |   |   |           |           |           |
|----|---|---|-----------|-----------|-----------|
| 12 | 1 | 0 | -5.621571 | -1.683396 | -0.258293 |
| 13 | 6 | 0 | 0.452599  | 2.246150  | -1.111210 |
| 14 | 6 | 0 | -3.653500 | -2.412269 | 0.289075  |
| 15 | 1 | 0 | -3.941022 | -3.460547 | 0.384437  |
| 16 | 6 | 0 | -4.151416 | -0.101303 | -0.143417 |
| 17 | 1 | 0 | -4.850444 | 0.699376  | -0.391913 |
| 18 | 6 | 0 | -2.811611 | 0.219561  | 0.117638  |
| 19 | 6 | 0 | -2.360937 | 1.665068  | 0.112512  |
| 20 | 1 | 0 | -3.187845 | 2.255873  | 0.530388  |
| 21 | 6 | 0 | 2.212118  | 3.860422  | -0.777428 |
| 22 | 1 | 0 | 2.708056  | 4.798851  | -1.036928 |
| 23 | 6 | 0 | 1.062851  | 3.457978  | -1.461134 |
| 24 | 1 | 0 | 0.645243  | 4.065367  | -2.265886 |
| 25 | 6 | 0 | -0.806155 | 1.740303  | -1.796734 |
| 26 | 1 | 0 | -0.780293 | 2.049661  | -2.852749 |
| 27 | 1 | 0 | -0.787357 | 0.640494  | -1.769971 |
| 28 | 7 | 0 | 2.207383  | -0.493572 | 1.272823  |
| 29 | 7 | 0 | 0.813958  | -1.700445 | -0.791306 |
| 30 | 6 | 0 | 2.326532  | -1.397225 | 2.423831  |
| 31 | 1 | 0 | 3.362844  | -1.431729 | 2.807376  |
| 32 | 1 | 0 | 2.027979  | -2.409703 | 2.116003  |
| 33 | 1 | 0 | 1.650939  | -1.058641 | 3.218817  |
| 34 | 6 | 0 | 0.062307  | -2.354397 | -1.692890 |
| 35 | 1 | 0 | -1.009895 | -2.156026 | -1.674016 |
| 36 | 6 | 0 | 1.985746  | -3.457113 | -2.602349 |
| 37 | 1 | 0 | 2.448382  | -4.153812 | -3.305170 |
| 38 | 6 | 0 | 2.072648  | 1.850439  | 0.525575  |
| 39 | 6 | 0 | 0.605360  | -3.237658 | -2.620402 |
| 40 | 1 | 0 | -0.045305 | -3.742671 | -3.336081 |
| 41 | 6 | 0 | 2.766219  | -2.765992 | -1.677487 |
| 42 | 1 | 0 | 3.849349  | -2.896803 | -1.639214 |
| 43 | 6 | 0 | 2.148398  | -1.876767 | -0.792314 |
| 44 | 6 | 0 | 2.964683  | -0.988281 | 0.111253  |
| 45 | 1 | 0 | 3.890310  | -1.499011 | 0.425219  |
| 46 | 1 | 0 | 3.278891  | -0.128942 | -0.502207 |
| 47 | 6 | 0 | 2.736305  | 3.042897  | 0.226542  |
| 48 | 1 | 0 | 3.647099  | 3.314662  | 0.763778  |
| 49 | 6 | 0 | 2.550351  | 0.898303  | 1.605122  |
| 50 | 1 | 0 | 3.634887  | 1.019447  | 1.775064  |
| 51 | 1 | 0 | 2.031732  | 1.143613  | 2.543548  |
| 52 | 8 | 0 | -0.297590 | 0.372433  | 2.475589  |
| 53 | 8 | 0 | -1.005564 | -0.617291 | 3.245358  |
| 54 | 1 | 0 | -1.923987 | -0.504415 | 2.945217  |
| 55 | 1 | 0 | -1.512569 | 1.775129  | 0.810205  |

-----  
Int2(triplet) E<sub>opt</sub> = -2878.8350736 hartree  
-----

| Center<br>Number | Atomic<br>Number | Atomic<br>Type | Coordinates (Angstroms) |           |           |
|------------------|------------------|----------------|-------------------------|-----------|-----------|
|                  |                  |                | X                       | Y         | Z         |
| 1                | 29               | 0              | 0.189265                | -0.385530 | 0.684123  |
| 2                | 7                | 0              | 0.604333                | 1.650424  | -0.175242 |
| 3                | 7                | 0              | -2.547994               | 1.716566  | -1.201614 |
| 4                | 7                | 0              | -1.753749               | -1.106355 | 0.484947  |
| 5                | 6                | 0              | -2.976991               | 3.110711  | -1.239357 |
| 6                | 1                | 0              | -2.864026               | 3.509260  | -2.259189 |
| 7                | 1                | 0              | -2.409864               | 3.773839  | -0.553725 |
| 8                | 1                | 0              | -4.040480               | 3.180926  | -0.963181 |
| 9                | 6                | 0              | -1.892653               | -2.437790 | 0.617232  |
| 10               | 1                | 0              | -0.989960               | -2.993217 | 0.883415  |
| 11               | 6                | 0              | -4.218795               | -2.320768 | 0.069072  |
| 12               | 1                | 0              | -5.189498               | -2.792461 | -0.101145 |
| 13               | 6                | 0              | -0.074407               | 2.273142  | -1.154456 |
| 14               | 6                | 0              | -3.106061               | -3.088710 | 0.422656  |
| 15               | 1                | 0              | -3.170629               | -4.171290 | 0.543886  |
| 16               | 6                | 0              | -4.075014               | -0.939244 | -0.043313 |
| 17               | 1                | 0              | -4.927856               | -0.305366 | -0.293360 |
| 18               | 6                | 0              | -2.826054               | -0.345603 | 0.186852  |
| 19               | 6                | 0              | -2.678177               | 1.160700  | 0.149635  |
| 20               | 1                | 0              | -3.593612               | 1.582168  | 0.587835  |
| 21               | 6                | 0              | 1.316702                | 4.224521  | -0.887079 |
| 22               | 1                | 0              | 1.598710                | 5.241225  | -1.171024 |
| 23               | 6                | 0              | 0.262007                | 3.578609  | -1.535206 |
| 24               | 1                | 0              | -0.292121               | 4.071154  | -2.336010 |
| 25               | 6                | 0              | -1.220483               | 1.512294  | -1.801709 |
| 26               | 1                | 0              | -1.282033               | 1.804111  | -2.861167 |
| 27               | 1                | 0              | -0.981022               | 0.438914  | -1.764968 |
| 28               | 7                | 0              | 2.271598                | 0.002862  | 1.226634  |
| 29               | 7                | 0              | 1.142388                | -1.577945 | -0.772232 |
| 30               | 6                | 0              | 2.619257                | -0.825496 | 2.386571  |
| 31               | 1                | 0              | 3.655959                | -0.638272 | 2.723271  |
| 32               | 1                | 0              | 2.522886                | -1.885953 | 2.112195  |
| 33               | 1                | 0              | 1.928092                | -0.615882 | 3.212175  |
| 34               | 6                | 0              | 0.552484                | -2.455189 | -1.599769 |
| 35               | 1                | 0              | -0.538273               | -2.486575 | -1.584279 |
| 36               | 6                | 0              | 2.672189                | -3.204481 | -2.429350 |
| 37               | 1                | 0              | 3.277016                | -3.848447 | -3.071991 |



|    |   |   |           |           |           |
|----|---|---|-----------|-----------|-----------|
| 38 | 6 | 0 | 1.631782  | 2.251604  | 0.442423  |
| 39 | 6 | 0 | 1.277103  | -3.285570 | -2.450049 |
| 40 | 1 | 0 | 0.754070  | -3.981573 | -3.107935 |
| 41 | 6 | 0 | 3.282842  | -2.283311 | -1.579061 |
| 42 | 1 | 0 | 4.368958  | -2.179395 | -1.542245 |
| 43 | 6 | 0 | 2.483874  | -1.469751 | -0.769712 |
| 44 | 6 | 0 | 3.081473  | -0.352712 | 0.049104  |
| 45 | 1 | 0 | 4.119137  | -0.593247 | 0.335940  |
| 46 | 1 | 0 | 3.138513  | 0.521970  | -0.617927 |
| 47 | 6 | 0 | 2.022978  | 3.551555  | 0.111930  |
| 48 | 1 | 0 | 2.869637  | 4.016231  | 0.621032  |
| 49 | 6 | 0 | 2.333443  | 1.442920  | 1.516796  |
| 50 | 1 | 0 | 3.375812  | 1.789697  | 1.634945  |
| 51 | 1 | 0 | 1.820488  | 1.610632  | 2.476215  |
| 52 | 8 | 0 | -0.375685 | 0.409397  | 2.481677  |
| 53 | 8 | 0 | -0.575875 | -0.497719 | 3.359021  |
| 54 | 1 | 0 | -1.847141 | 1.455056  | 0.815390  |

-----

Int3(doublet)  $E_{\text{opt}} = -2878.6717152$  hartree

| Center<br>Number | Atomic<br>Number | Atomic<br>Type | Coordinates (Angstroms) |           |           |
|------------------|------------------|----------------|-------------------------|-----------|-----------|
|                  |                  |                | X                       | Y         | Z         |
| 1                | 29               | 0              | 0.377153                | -0.177262 | 0.408158  |
| 2                | 7                | 0              | -0.451500               | 1.697494  | -0.139966 |
| 3                | 7                | 0              | -3.057004               | 0.204894  | -1.419712 |
| 4                | 7                | 0              | -0.895635               | -1.771355 | 0.195717  |
| 5                | 6                | 0              | -4.161701               | 1.159057  | -1.472235 |
| 6                | 1                | 0              | -4.238587               | 1.583906  | -2.484410 |
| 7                | 1                | 0              | -4.060278               | 2.001219  | -0.757470 |
| 8                | 1                | 0              | -5.107531               | 0.643667  | -1.245939 |
| 9                | 6                | 0              | -0.289367               | -2.966515 | 0.336384  |
| 10               | 1                | 0              | 0.772796                | -2.948157 | 0.587861  |
| 11               | 6                | 0              | -2.326103               | -4.130193 | -0.131681 |
| 12               | 1                | 0              | -2.893009               | -5.053168 | -0.273022 |
| 13               | 6                | 0              | -1.257338               | 1.944917  | -1.189639 |
| 14               | 6                | 0              | -0.965967               | -4.170413 | 0.183888  |
| 15               | 1                | 0              | -0.431753               | -5.113215 | 0.309957  |
| 16               | 6                | 0              | -2.955013               | -2.891746 | -0.241005 |
| 17               | 1                | 0              | -4.022994               | -2.821526 | -0.454679 |
| 18               | 6                | 0              | -2.221644               | -1.713405 | -0.054174 |
| 19               | 6                | 0              | -2.921263               | -0.373696 | -0.079780 |
| 20               | 1                | 0              | -3.934903               | -0.535824 | 0.310448  |

|    |   |   |           |           |           |
|----|---|---|-----------|-----------|-----------|
| 21 | 6 | 0 | -1.099226 | 4.312236  | -0.746137 |
| 22 | 1 | 0 | -1.354913 | 5.345780  | -0.990041 |
| 23 | 6 | 0 | -1.604037 | 3.262126  | -1.513156 |
| 24 | 1 | 0 | -2.256178 | 3.450654  | -2.367171 |
| 25 | 6 | 0 | -1.804586 | 0.755714  | -1.954529 |
| 26 | 1 | 0 | -1.980710 | 1.056185  | -2.997215 |
| 27 | 1 | 0 | -1.040530 | -0.035947 | -1.964034 |
| 28 | 7 | 0 | 1.719699  | 1.057554  | 1.319749  |
| 29 | 7 | 0 | 2.121366  | -0.752110 | -0.679881 |
| 30 | 6 | 0 | 2.249394  | 0.323485  | 2.486950  |
| 31 | 1 | 0 | 2.928944  | 0.969551  | 3.067871  |
| 32 | 1 | 0 | 2.800259  | -0.561117 | 2.142056  |
| 33 | 1 | 0 | 1.416159  | 0.000238  | 3.123206  |
| 34 | 6 | 0 | 2.312669  | -1.804018 | -1.491284 |
| 35 | 1 | 0 | 1.468065  | -2.482451 | -1.625707 |
| 36 | 6 | 0 | 4.569445  | -1.124264 | -1.932540 |
| 37 | 1 | 0 | 5.536632  | -1.273892 | -2.417625 |
| 38 | 6 | 0 | 0.060685  | 2.701836  | 0.596354  |
| 39 | 6 | 0 | 3.522611  | -2.025918 | -2.142603 |
| 40 | 1 | 0 | 3.636657  | -2.891993 | -2.796271 |
| 41 | 6 | 0 | 4.364380  | -0.027030 | -1.095551 |
| 42 | 1 | 0 | 5.154247  | 0.703040  | -0.911163 |
| 43 | 6 | 0 | 3.116622  | 0.136504  | -0.491554 |
| 44 | 6 | 0 | 2.778365  | 1.352556  | 0.330064  |
| 45 | 1 | 0 | 3.669799  | 1.761551  | 0.831513  |
| 46 | 1 | 0 | 2.403484  | 2.128318  | -0.356208 |
| 47 | 6 | 0 | -0.244677 | 4.033056  | 0.322906  |
| 48 | 1 | 0 | 0.192276  | 4.828266  | 0.928851  |
| 49 | 6 | 0 | 0.968464  | 2.269614  | 1.717697  |
| 50 | 1 | 0 | 1.657014  | 3.075982  | 2.016344  |
| 51 | 1 | 0 | 0.356473  | 2.005152  | 2.593284  |
| 52 | 8 | 0 | -1.193471 | -0.088989 | 2.877753  |
| 53 | 8 | 0 | -1.031360 | -1.185772 | 3.334260  |
| 54 | 1 | 0 | -2.418942 | 0.303712  | 0.635272  |

---
